# Supplementary material for: Use of Remotely Piloted Aircraft System Multispectral Data to Evaluate the Effects of Prescribed Burnings on Three Macrohabitats of Pantanal, Brazil
Source: MDPI journal article supplement (doi:10.3390/rs15112934), 2023-06-04
Supplement: s1 [file s1]

Archive with 1 entries (1 files):
- remotesensing-2337073-supplementary.pdf
